# Supplementary material
Source: PubMed Central journal article supplement (PMC6064989)
Supplement: pnas.1807329115.sapp.pdf [file pnas.1807329115.sapp.pdf]

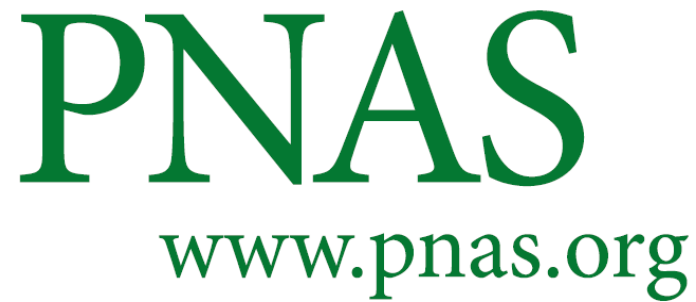

Supplementary Information for

**Template and primer requirements for DNA Pol  $\theta$ -mediated end joining**

Peng He and Wei Yang

Wei Yang

Email: [wei.yang@nih.gov](mailto:wei.yang@nih.gov)

**This PDF file includes:**

Figs. S1 to S3

Tables S1

## **Materials and Methods**

### **DNA oligonucleotides**

Non-self-complementary oligos were designed to test DNA synthesis activity of Pol $\theta$  and the base-pair requirement between template and primer (Table S1). Initially, mixed purine and pyrimidine sequences, or purines or pyrimidines only were used. To make unique template and primer pairs and avoid unwanted intra- and inter-strand base pairing, we eventually designed primers, which contained mostly dCs except for one or two dTs for distinct register, and the templates, which contained dGs and dAs to pair with the primers and an overhang of six dAs for directing dTTP incorporation. DNA oligonucleotides were purchased from Integrated DNA Technologies (IDT) or the Facility for Biotechnology Resources (FBR) and PAGE purified. Because there were no more than 6 bp, template and primer at a 1:1 molar ratio were simply mixed in TE buffer (pH 8.0) before mixing with Pol $\theta$ .

### **Expression and purification of human Pol $\theta$**

Cloning and expression of human Pol  $\theta$  were reported previously (23). Briefly, human POLQ cDNA was extracted from HEK293 cells by RT-PCR. Two versions of the polymerase domain, consisting of residues 1822-2590 (POLQ86) and residues 1792-2590 (POLQ90) (19-21), were amplified and cloned into the mammalian expression vector pLEXm (26). To improve protein solubility and ease purification, a His<sub>8</sub> tag and two tandem copies of the maltose-binding protein (2MBP) followed by a PreScission protease cleavage site were fused to the N-terminus of POLQ86. Because both truncated Pol  $\theta$  exhibit similar polymerase activities (Fig. S5 in reference #23), we chose to use the

shorter version (Pol  $\theta$ 86) in this study. The 8His-2MBP–tagged Pol  $\theta$ 86 variant (86 kDa), which is simply referred to as Pol $\theta$  in this paper, was overexpressed in HEK293GNT1 cells according to the protocol described previously (23). His<sub>8</sub>-2MBP–tagged Pol $\theta$  was first purified with amylose resin (NEB). After cleaving off the 8His-2MBP tag by PreScission protease, Pol $\theta$  was further purified over a HiTrap Heparin HP column and followed by Superdex 200 (GE Healthcare). Purified proteins were concentrated to ~4 mg/ml and stored at –20 °C in 20 mM Tris, pH 8.0, 0.15 M NaCl, 0.5 mM TCEP and 30% glycerol. All purification steps were performed at 4°C. Pol $\theta$  expressed in mammalian culture appears to be much more active than E. coli expressed protein (20,23,27).

### **DNA synthesis assay**

Pol $\theta$  activities were measured as previously described (23). Briefly, the DNA primer was <sup>32</sup>P-labeled at the 5' end. Reactions were carried out in 10  $\mu$ L of the standard reaction buffer (20 mM Tris, pH 8.0, 100 mM NaCl, 0.5mM TCEP and 5 mM MgCl<sub>2</sub>) with 100 nM DNA substrates, 10 nM or 100 nM Pol $\theta$ , and 400  $\mu$ M of mixed four dNTPs or 100  $\mu$ M of a single dNTP at either 25°C or 37°C. After pre-incubation of the protein-DNA mixture for 5 min, reactions were initiated by addition of desired nucleotides and 5 mM MgCl<sub>2</sub>. After incubation for a desired time (0~20 min), each reaction was terminated by addition of equal volume (10  $\mu$ L) of 90% formamide quench buffer. Samples were denatured at 95°C for 5 min, and the reaction products were resolved on 20% or 25% polyacrylamide-urea gels in 1 $\times$  TBE buffer, and visualized on a Typhon Trio (GE Healthcare). All products were quantified using ImageQuant TL (GE Healthcare).

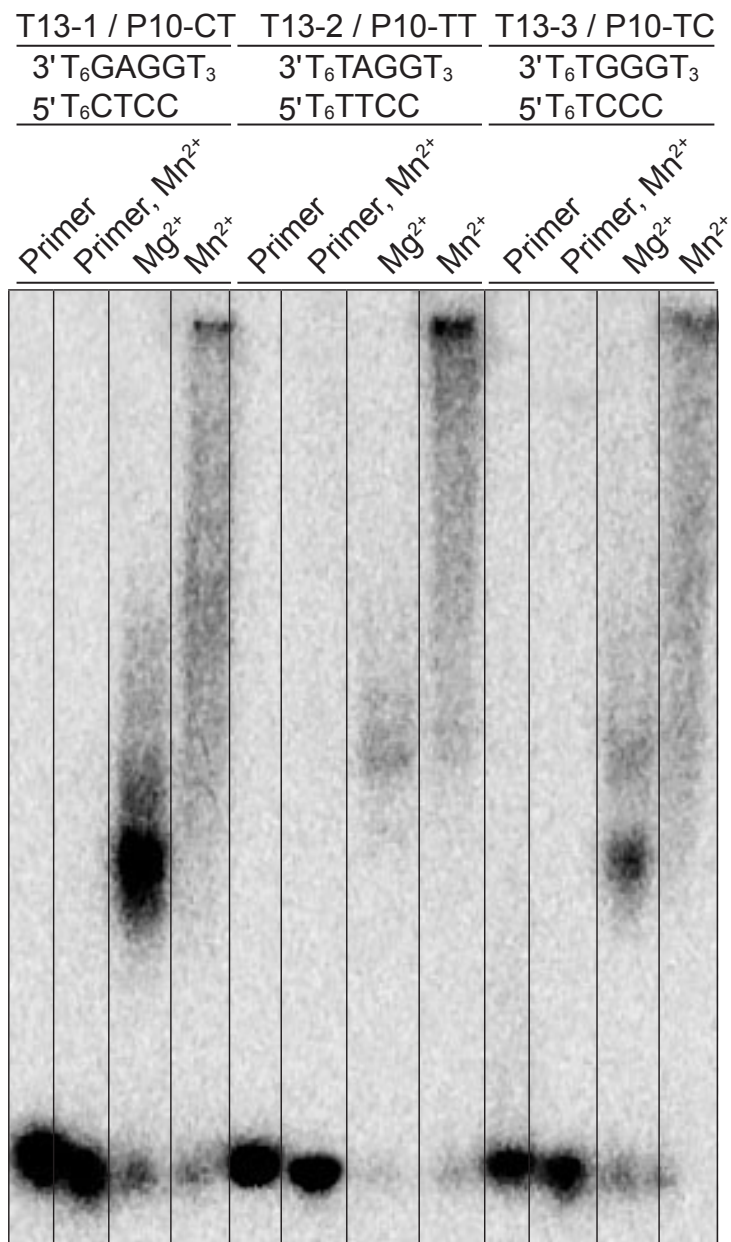

**Figure S1.** With PCR-like reaction, Pol $\theta$  made more and longer products with Mn<sup>2+</sup> than with Mg<sup>2+</sup> at 37°C. For each substrate, first lane is primer alone without dNTPs, second lane is primer alone as substrate in the presence of Mn<sup>2+</sup>, third lane is template / primer with Mg<sup>2+</sup>, fourth lane is DNA substrate with Mn<sup>2+</sup>. The reaction conditions is 37°C, 30 min, 50 nM Pol $\theta$ , 100 nM DNA substrate, 0.1 mM of all four dNTPs in the standard reaction buffer.

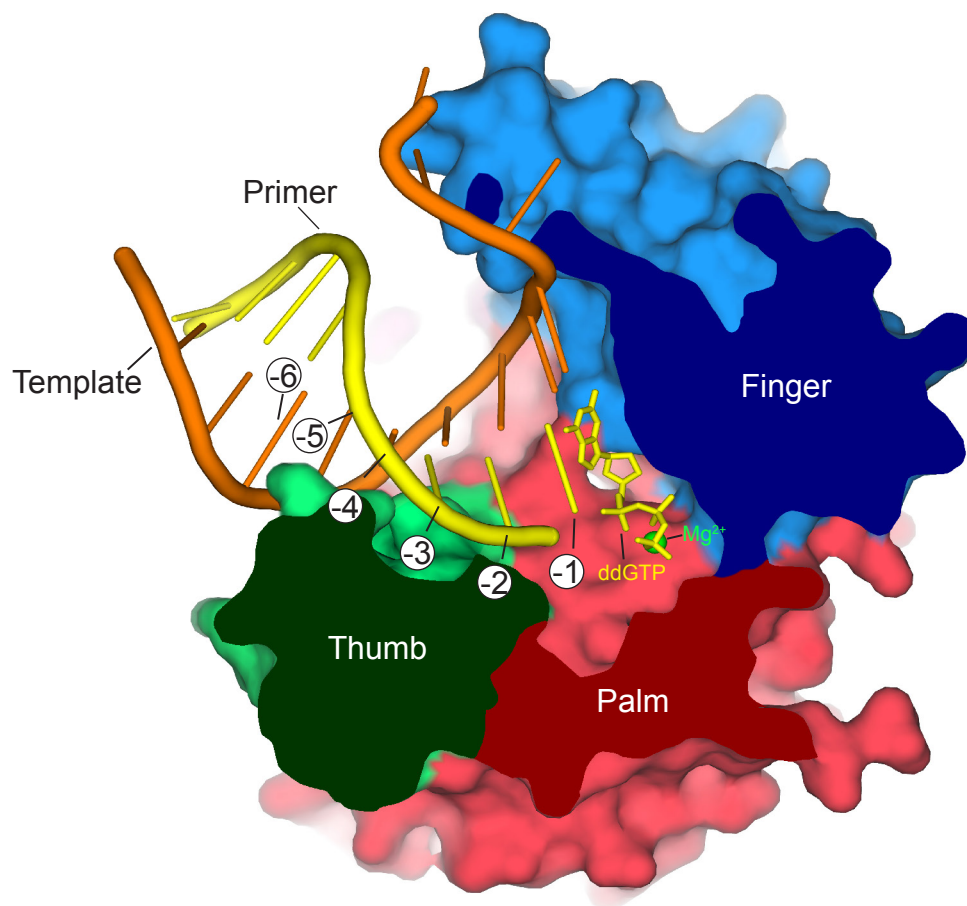

**Figure S2.** Crystal structure of Polθ-DNA-ddGTP complex (PDB: 4X0Q) (19). Polθ interacts with 6 bp upstream from the nascent base pair.

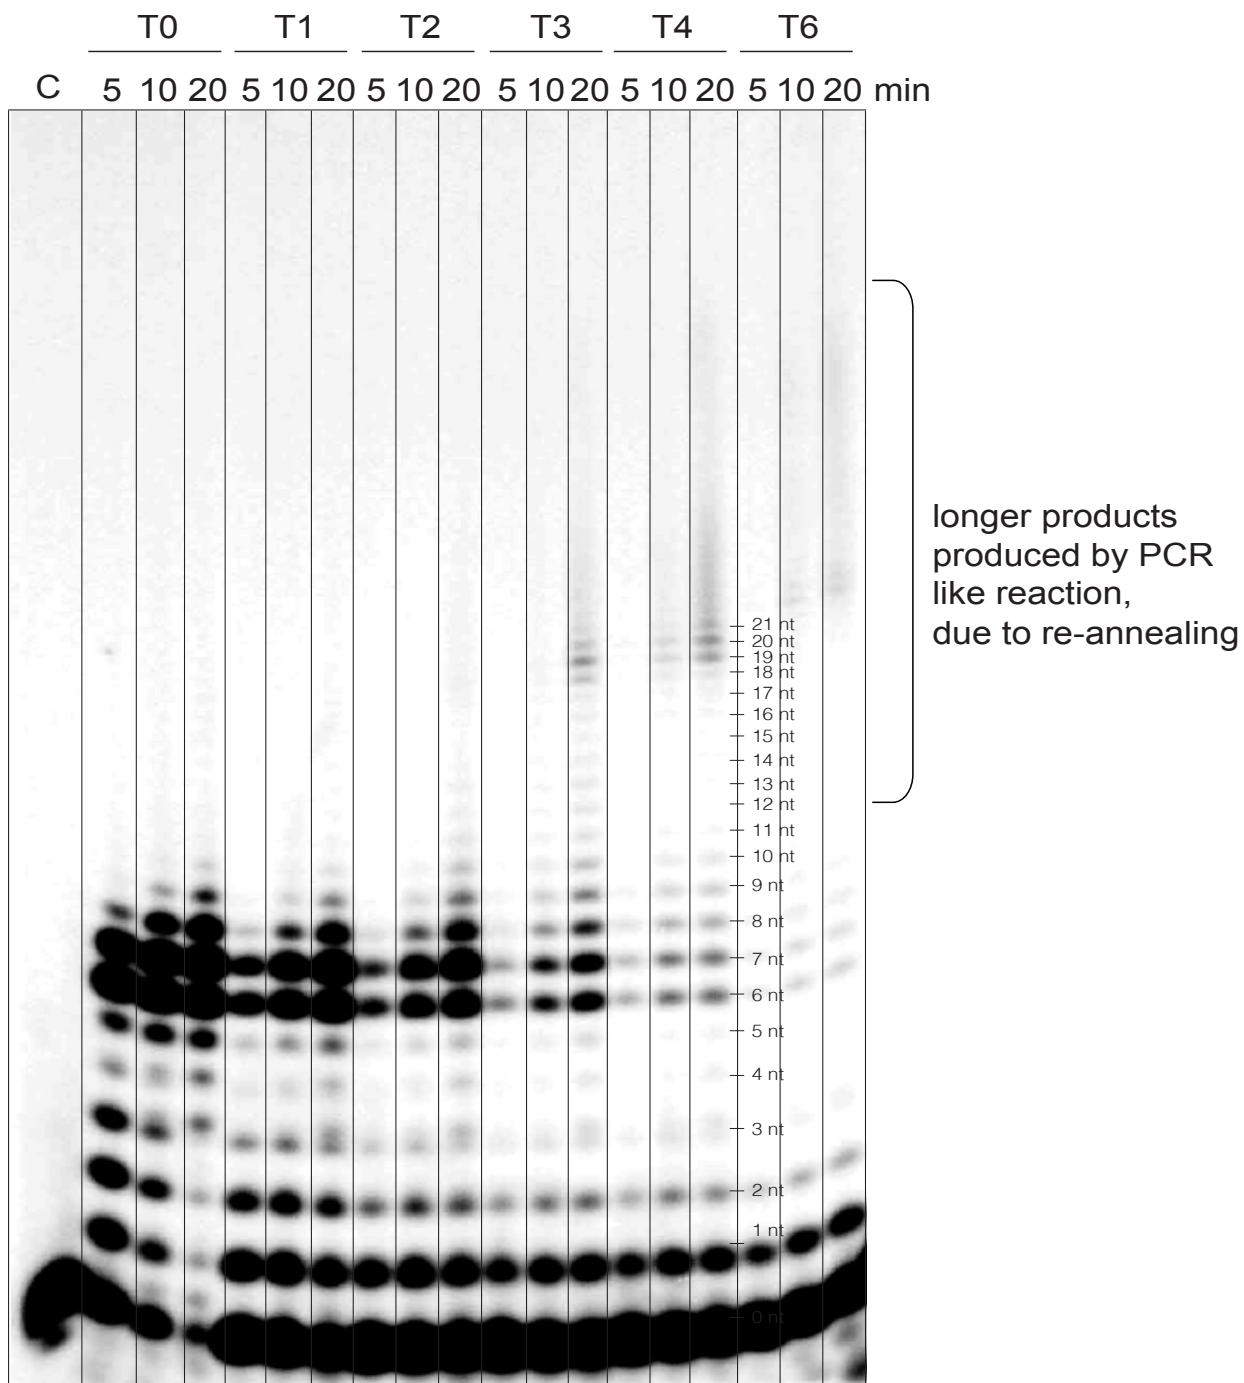

**Figure S3.** Higher contrast of Figure 4B reveals longer products due to re-annealing induced PCR-like reactions.

**Supplemental Table 1. Oligos used in this work**

| Oligo name | Oligo sequence                 | DNA substrate                         | Figure                      |
|------------|--------------------------------|---------------------------------------|-----------------------------|
| P0         | 5' TCC                         |                                       | 3A-C                        |
| P1         | 5' CTCC                        |                                       | 3A-C                        |
| P2         | 5' CCTCC                       |                                       | 3A-C                        |
| P3         | 5' CCCTCC                      |                                       | 3A-C                        |
| P4         | 5' CCCCCTCC                    |                                       | 3A-C                        |
| P9-T       | 5' TTTTTTTTCC                  |                                       | 1C-D                        |
| P9-C       | 5' CCCCCCTCC                   | MM-4, T-6s, T-23s,<br>6s-17d, 6s-p17d | 1C, 1E, 3A-C, 4A-C,<br>5A-C |
| P10-CT     | 5' TTTTTTTCTCC                 |                                       | S1                          |
| P10-TT     | 5' TTTTTTTTCC                  |                                       | S1                          |
| P10-TC     | 5' TTTTTTTTCCC                 |                                       | S1                          |
| P-MM-1     | 5' CCCCCCTCCC                  | MM-1                                  | 4A-C                        |
| P-MM-2     | 5' CCCCCTTTC                   | MM-2                                  | 4A-C                        |
| P-MM-3     | 5' CCCCCTCCC                   | MM-3                                  | 4A-C                        |
| P-17d      | 5' TTGCATCGAATGACAGG           | 6s-17d                                | 5A-C                        |
| P-p17d     | 5' p-TTGCATCGAATGACAGG         | 6s-p17d                               | 5A-C                        |
|            |                                |                                       |                             |
| T1         | 3' GAAAAAA                     |                                       | 1C-D, 2A-C                  |
| T2         | 3' GGAAAAAA                    |                                       | 1C-D, 2A-C                  |
| T3         | 3' AGGAAAAAA                   |                                       | 1C-E, 2A-C, 3A-E,<br>3D-E   |
| T4         | 3' GAGGAAAAAA                  | T-6s                                  | 2A-D 5A-C                   |
| T5         | 3' GGAGGAAAAAA                 |                                       | 2A-C                        |
| T6         | 3' GGGAGGAAAAAA                |                                       | 2A-C                        |
| T7         | 3' AAGGAAAAAA                  |                                       | 3D-E, 4A-C                  |
| T8         | 3' AAAGGAAAAAA                 |                                       | 3D-E                        |
| T9         | 3' AAAAGGAAAAAA                |                                       | 3D-E                        |
| T10        | 3' AAAAAAGGAAAAAA              |                                       | 3D-E                        |
| T11        | 3' AAAAAAAGGAAAAAA             |                                       | 3D-E                        |
| T13-1      | 3' TTTTTTGAGGTTT               |                                       | 1B, S1                      |
| T13-2      | 3' TTTTTTTAGGTTT               |                                       | 1B, S1                      |
| T13-3      | 3' TTTTTTTGGGTTT               |                                       | 1B, S1                      |
| T-23S      | 3' GAGGAAAAAAAACGTAGCTTACTGTCC | T-23s, 6s-17d,<br>6s-p17d             | 5A-C                        |
